# Supplementary material for: Constraining the rheology of the lower mantle with the global trend in slab sinking
Source: Research Square preprint supplement (doi:10.21203/rs.3.rs-5805059/v1), 2025-02-14
Supplement: Supplementary file 1 [file 7d26f4dd4598448dae80fdf4.docx]

**Supplementary Video 1** ( SI_Video_1_Fig2a_ML_90_32_19_15.mp4 )

*Slab sinking behavior as a function of yield stress and vacancy concentration of 4 models of* ***Fig. 2a***. The title in each panel gives the model name, providing the link to the corresponding slab-bottom sinking curve in Fig. 2a, yield stress , vacancy concentration , Clapeyron slopes (MPa/K) at the 410 km and 660 km mantle phase changes, and the viscosity of the oceanic crust upon subduction, respectively. Presentation as in Fig. 3 of the main text. Displayed are mantle flow (white vectors) and the PCC viscosity field (color contouring) and the temperature field (yellow line contours) in 250 K steps. The latter serves following the cold sinking slab.

**Supplementary Video 2** ( SI_Video_2_Fig2a_ML_140_111_104_118)

*Slab sinking behavior as a function of yield stress and vacancy concentration of 4 other models of* ***Fig. 2a****.* For description see text SI Video 1.

**Supplementary Video 3** ( SI_Video_3_Fig2b_ML_147_148_112_146)

*Slab sinking behavior as a function of yield stress and vacancy concentration of 4 models of* ***Fig. 2b****.*  For description see text SI Video 1

**Supplementary Video 4** ( SI_video_4_Fig2b_ML_122_102_123_97)

*Slab sinking behavior as a function of yield stress and vacancy concentration of 4 other models of* ***Fig. 2b****.* For description see text SI Video 1. Model 97 concerns the slab sinking model in the Newtonian linear creep mantle. See Fig. 3 for description.

**Supplementary Video 5** ( SI_Video_5_ML_102_97_112_147 )

*Slab sinking models corresponding to the vacancy concentration range obtained.* Summary video showing 3 PCC models (102, 147, and 112) that illustrate the vacancy concentration range of obtained from sinking models that match the inferred slab sinking trend (see Fig. 2b)*.* Model 97 (slab sinking in the Newtonian mantle) is also displayed for comparison of slab sinking in the PCC and Newtonian mantle.

**Supplementary Video 6** ( SI_Video_6_stress_ML_102_97_112_147)

*The stress field evolution in the models of SI Video 4* showing a more smoothy distributed stress field in the PCC mantle as compared to the Newtonian mantle. Yet, ambient to the sinking slab the mantle stress is of comparable magnitude in the PCC and Newtonian mantle.

**Supplementary Video 7** ( SI_Video_7_strainrate_ML_102_97_112_147)

*The strain rate field evolution in the models of SI Video 4* illustrating strain rate localization ambient to the sinking slab and rising plume as compared to the strain rate field in the Newtonian mantle.

**Supplementary Video 8** ( SI_Video_8_absvel_ML_102_97_112_147)

*The amplitude of the mantle flow obtained for the models of SI Video 4* provides another illustration of the propensity for flow localization in high-stress regions around the slab and rising plume, as compared to the Newtonian mantle, and as well illustrates the low amplitude of mantle flow of 1-2 cm/a around the slab and plume and sub-cm/a elsewhere. The initial plume uprising is associated with a broad ‘spike’ in mantle flow of a limited time span, shorter in the PCC mantle than in the Newtonian mantle.
